# Supplementary material for: Gram-negative ESKAPE bacteria bloodstream infections in patients during the COVID-19 pandemic
Source: PubMed Central journal article supplement (PMC10066687; doi:10.7717/peerj.15007), 2023-03-29

Uncropped Gels  
*Acinetobacter baumannii*



**Gel 3 *Acinetobacter baumannii***

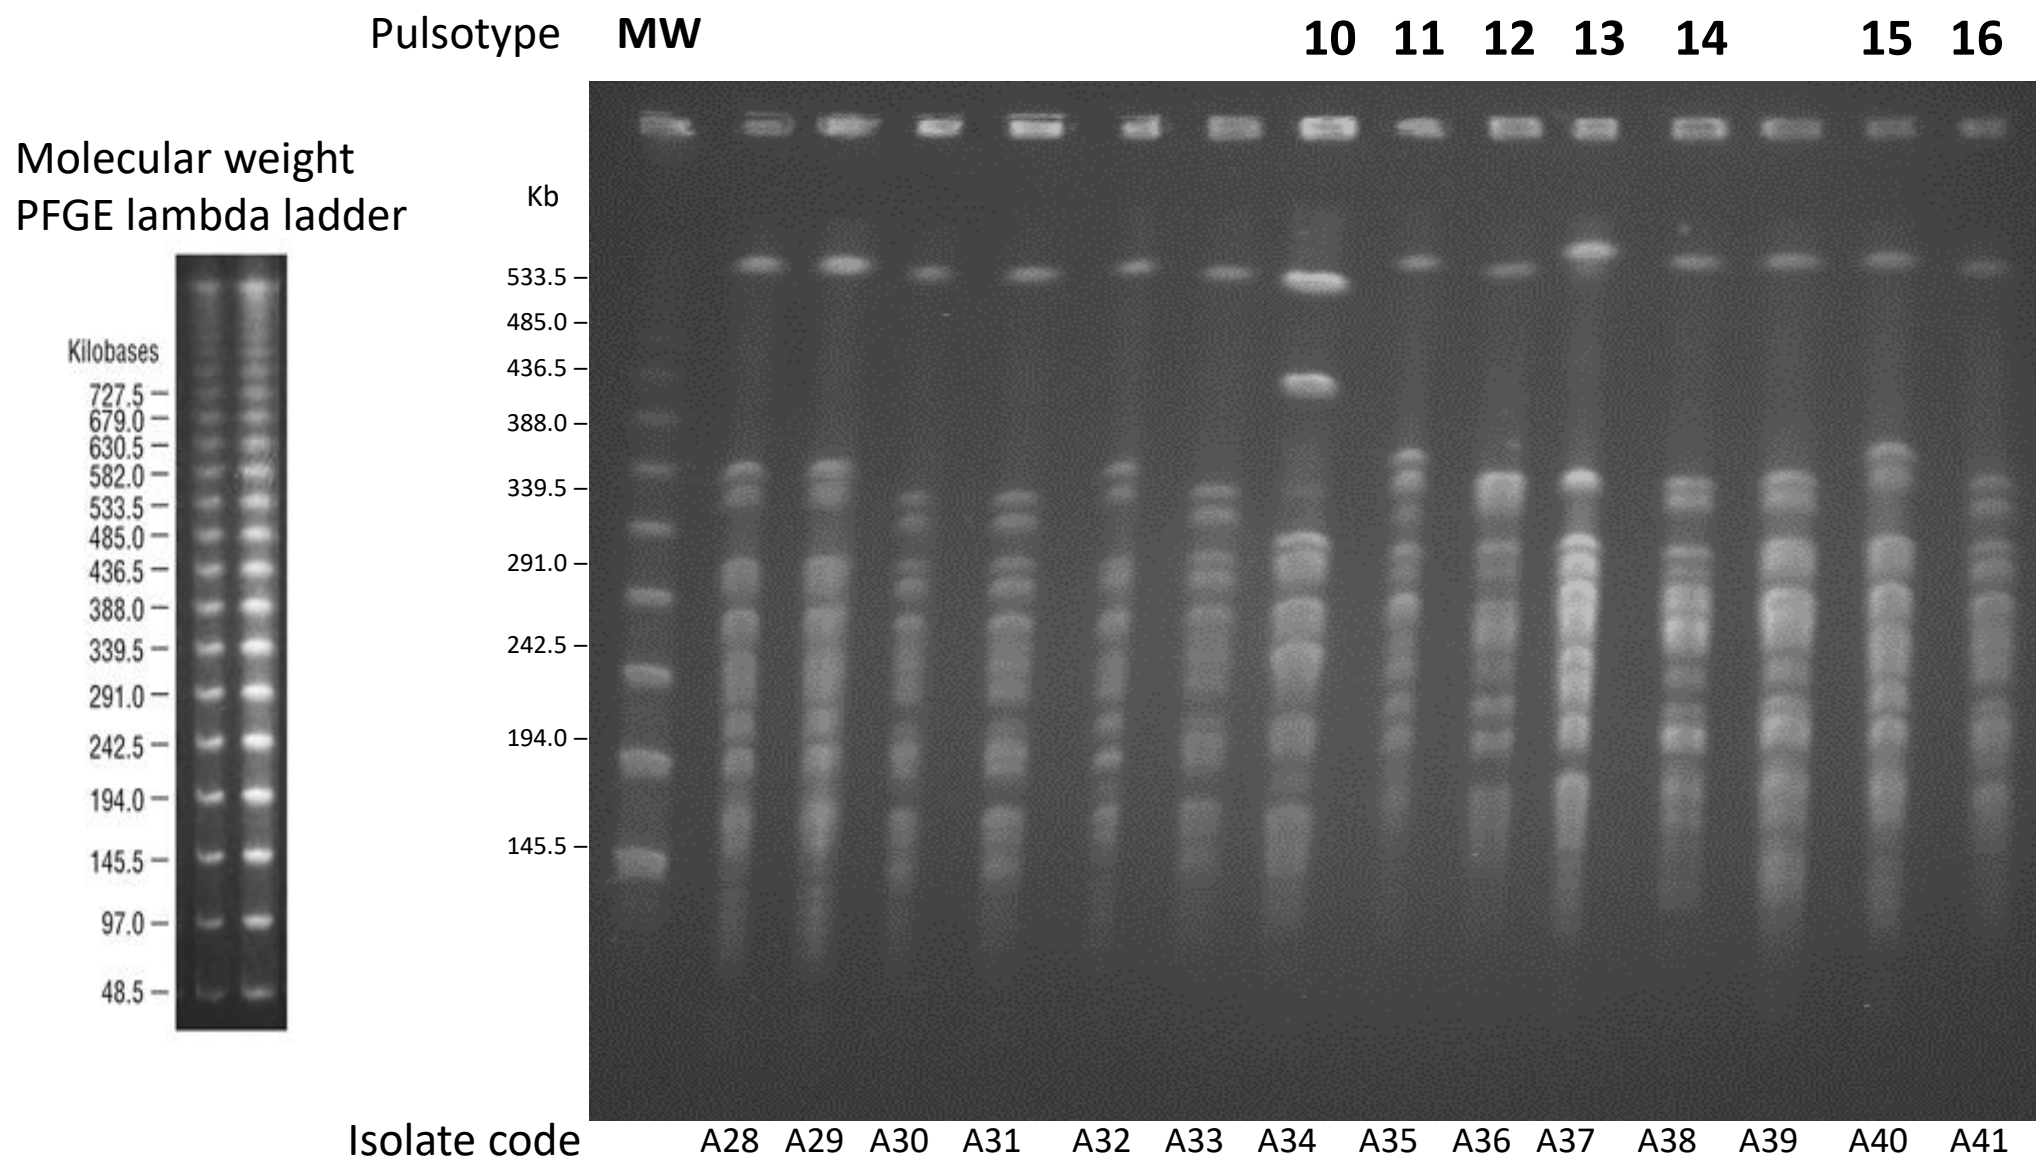

**Gel 4 *Acinetobacter baumannii***

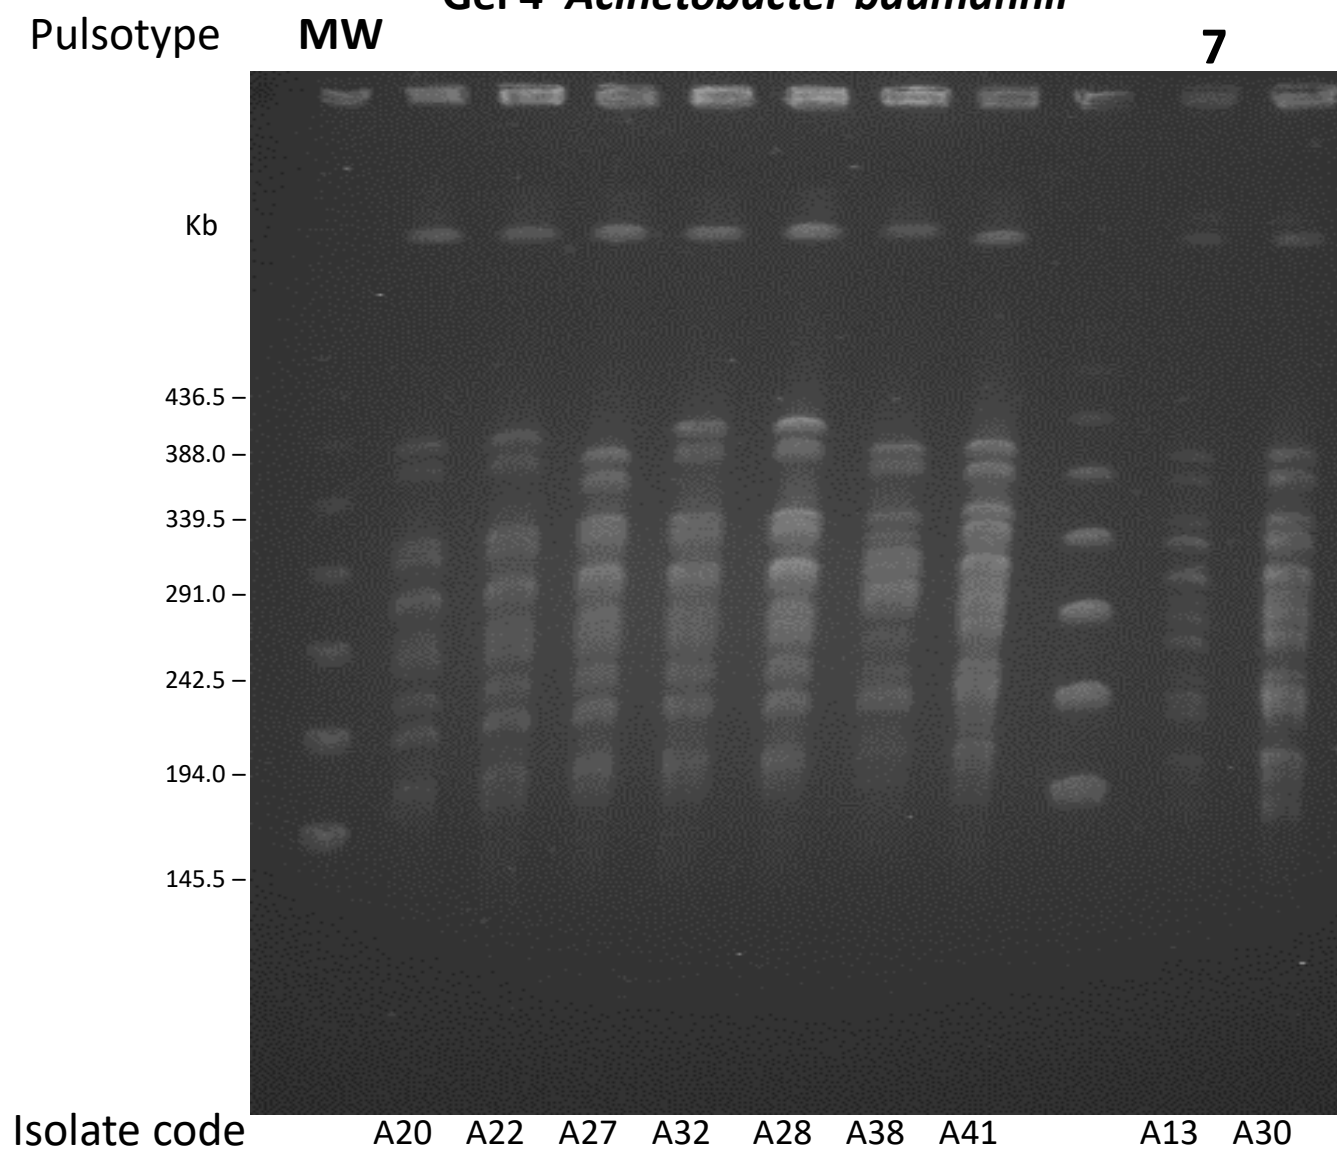

**Gel 5 *Acinetobacter baumannii***

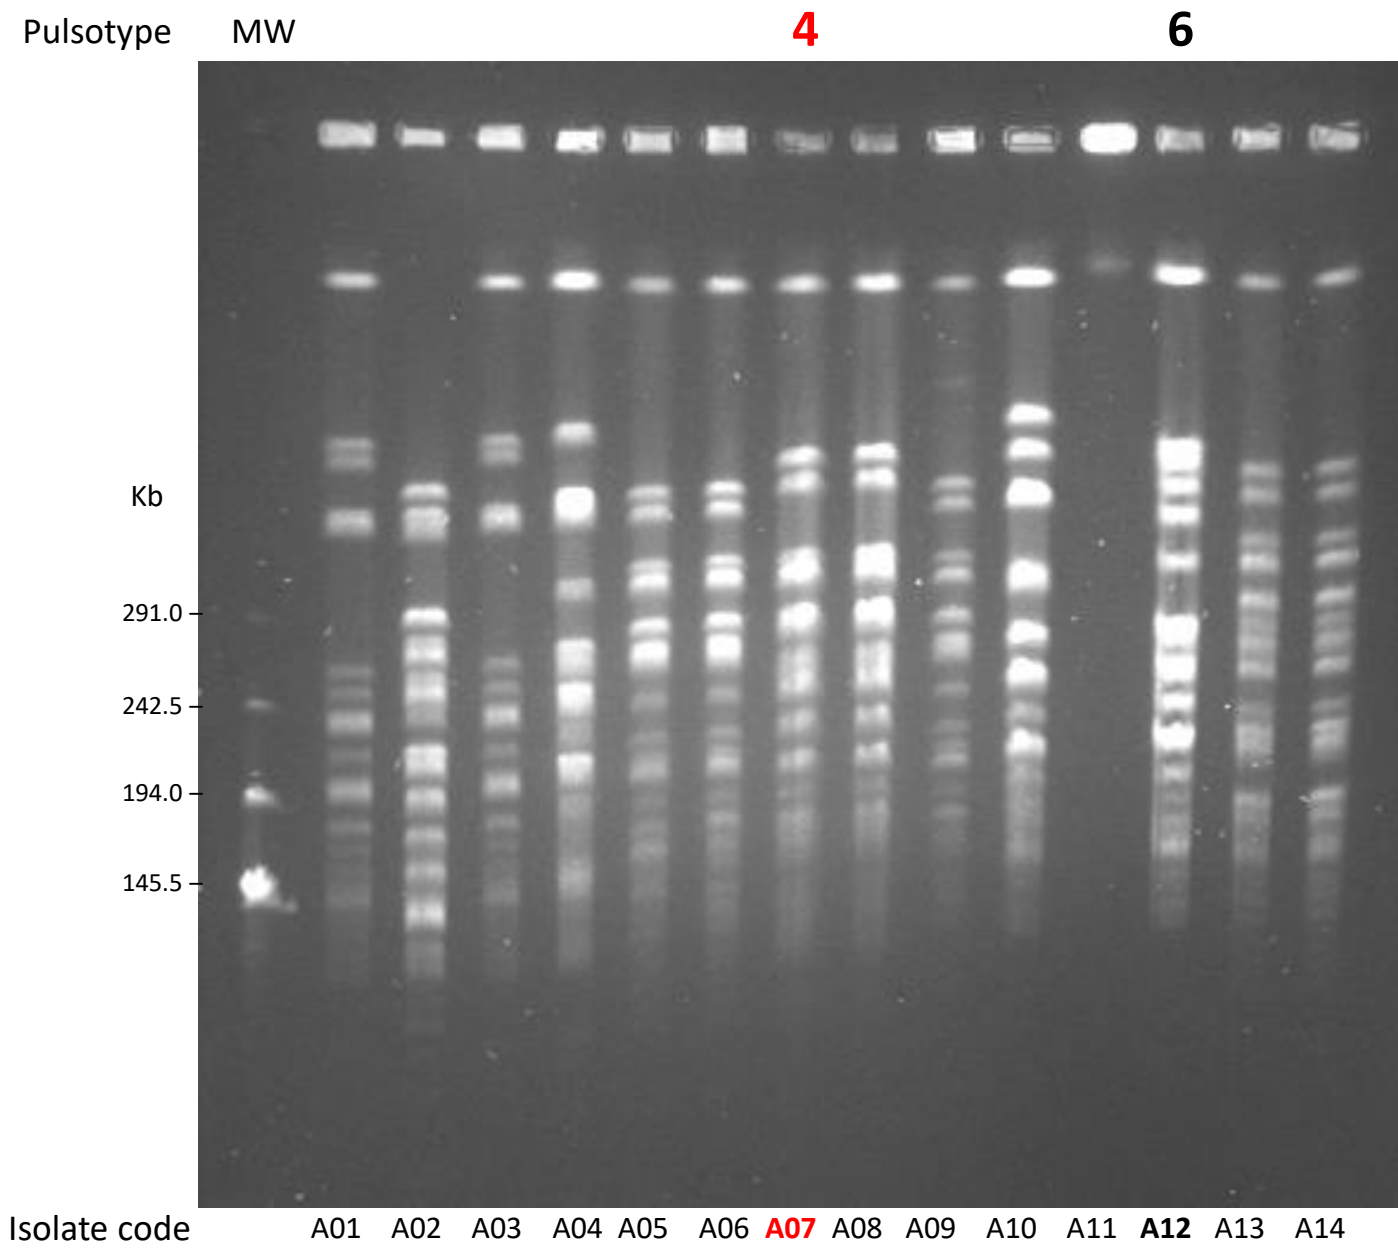

**A07** = Outbreak strain- PFGE pattern (pulsotype 4)

Uncropped Gels  
*Klebsiella pneumoniae*

*Klebsiella pneumoniae* ( n = 29, pulsotypes = 25)  
Hospital General de México Dr. Eduardo Liceaga 2020

**Gel 1 *Klebsiella pneumoniae***

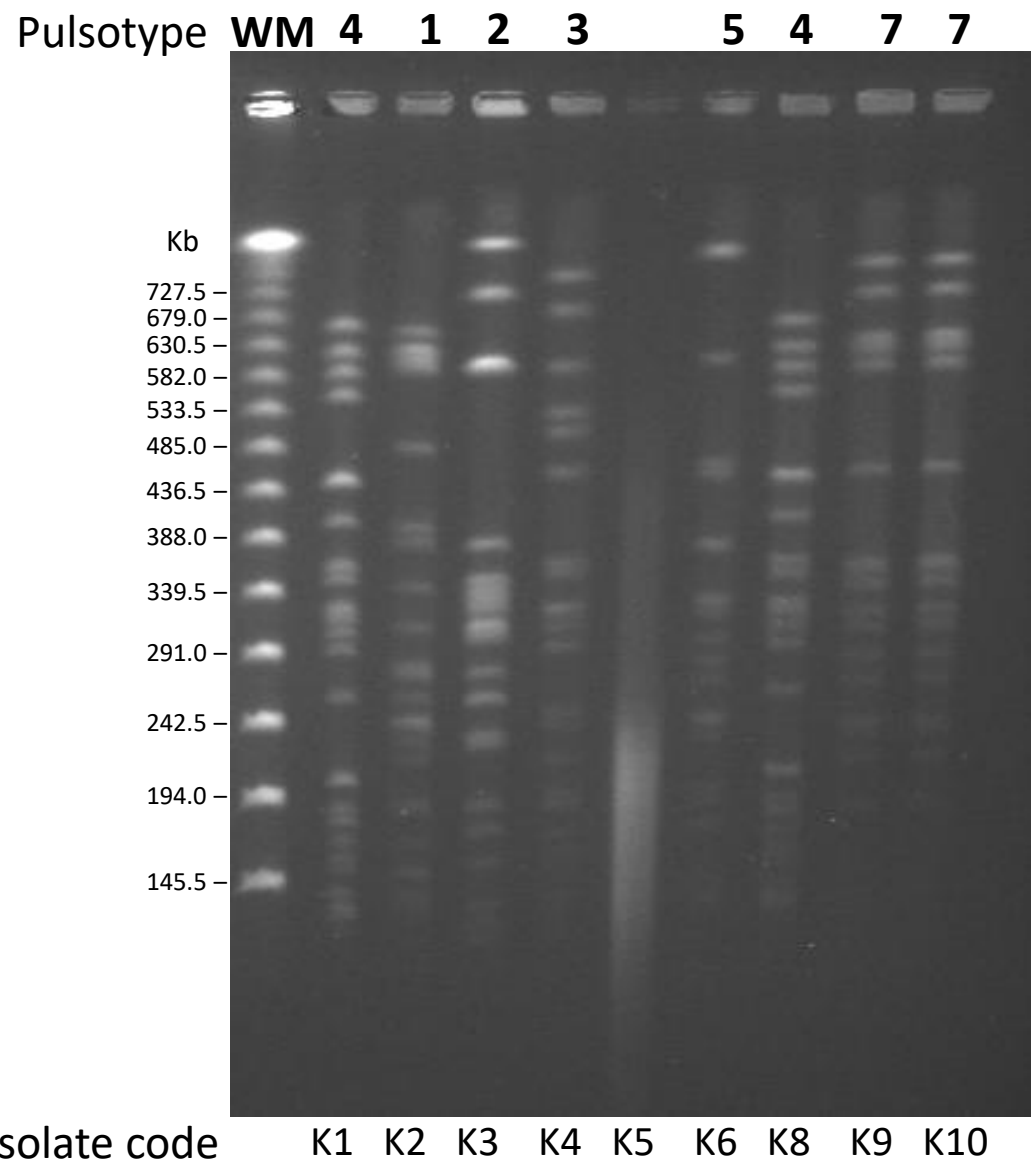

Molecular weight  
PFGE lambda ladder

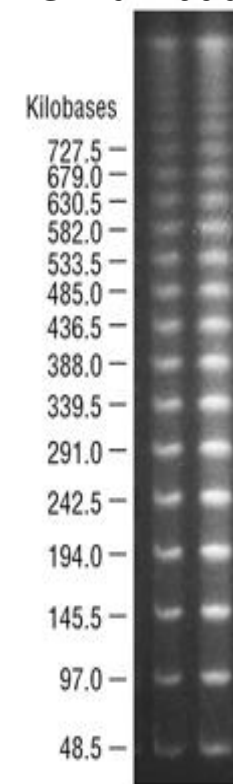

**Gel 2 *Klebsiella pneumoniae***

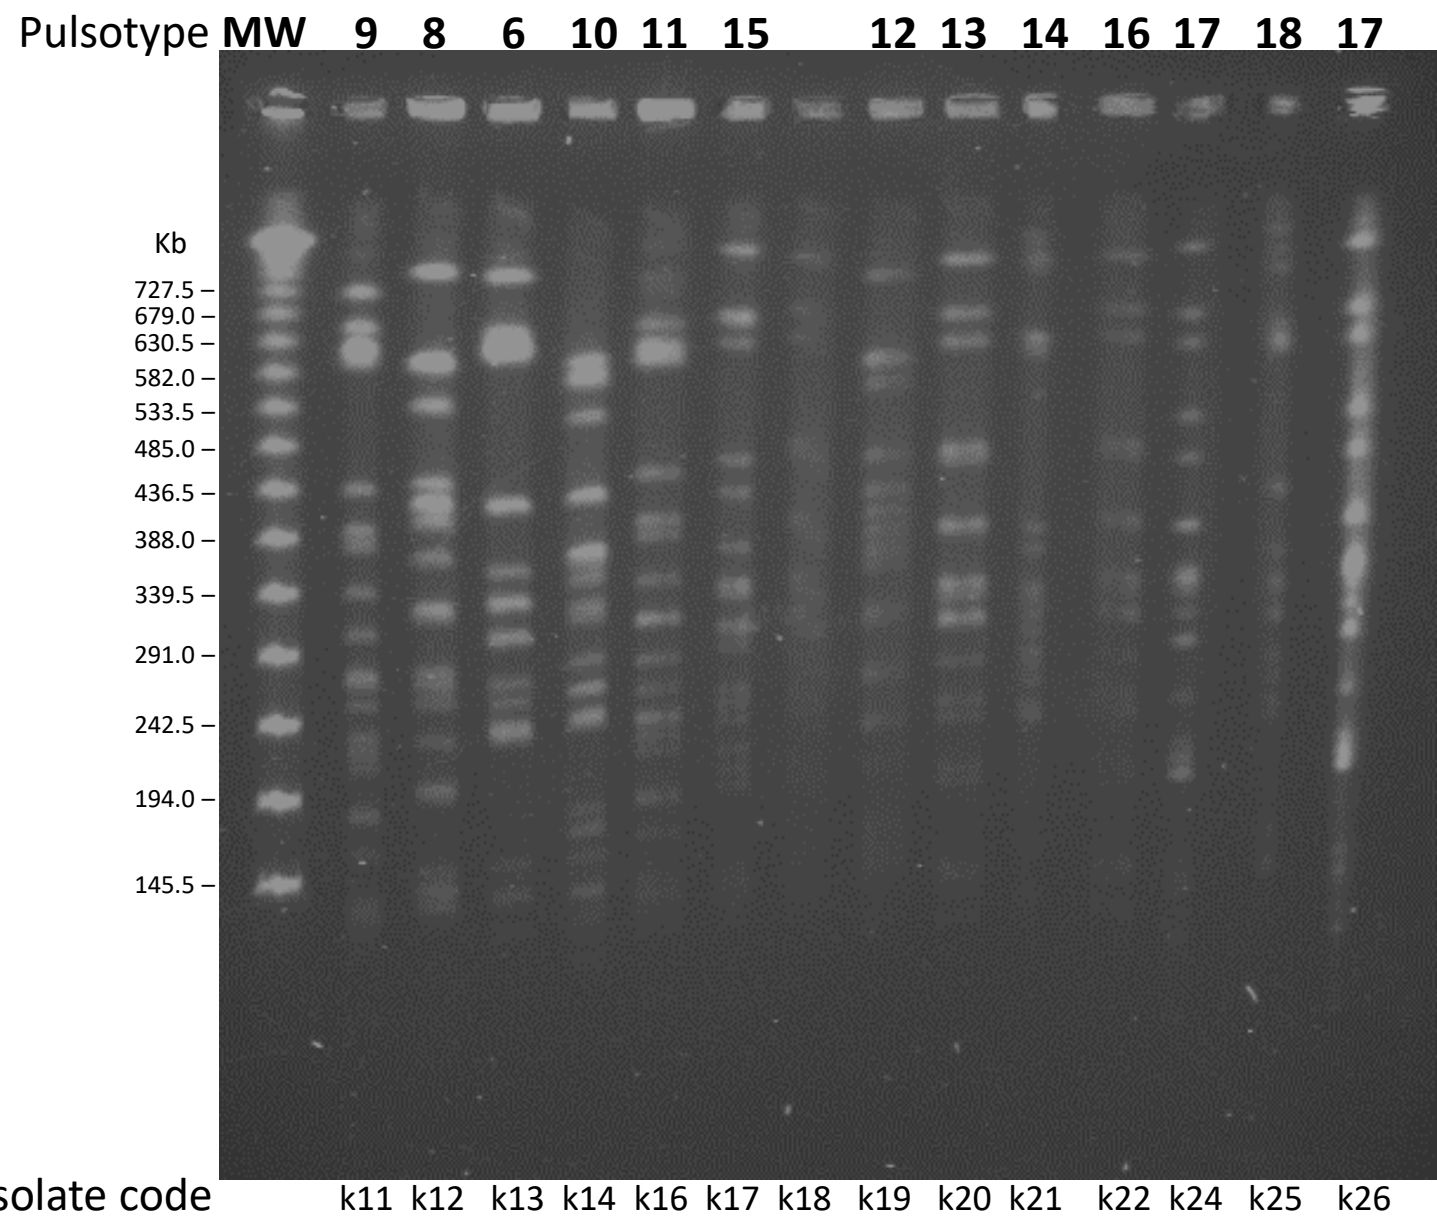

**Gel 3 *Klebsiella pneumoniae***

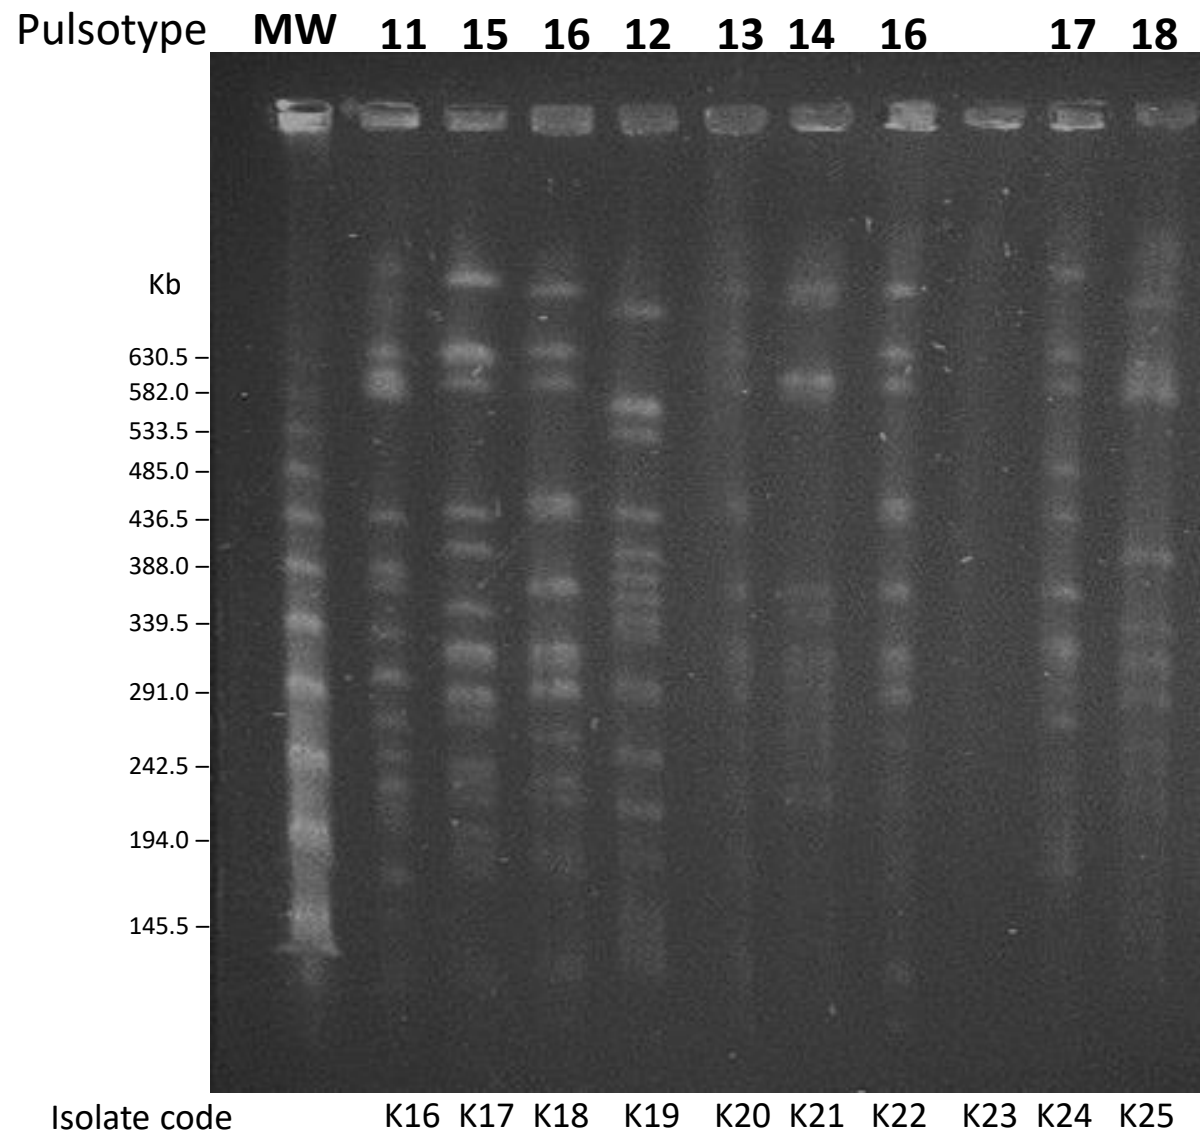

**Gel 4 *Klebsiella pneumoniae***

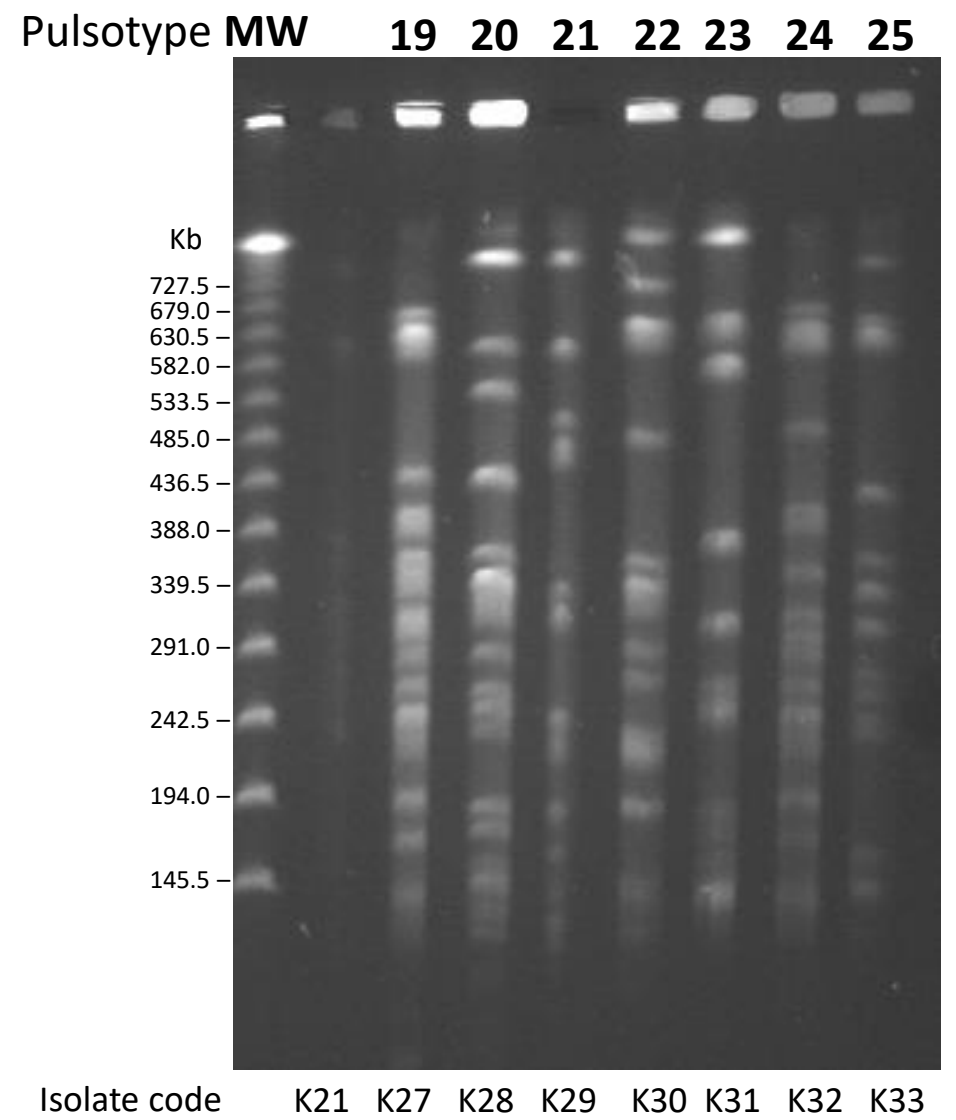

Uncropped Gels  
*Pseudomonas aeruginosa*



*Pseudomonas aeruginosa* (n = 21, pulsotypes = 20)  
Hospital General de México Dr. Eduardo Liceaga 2020

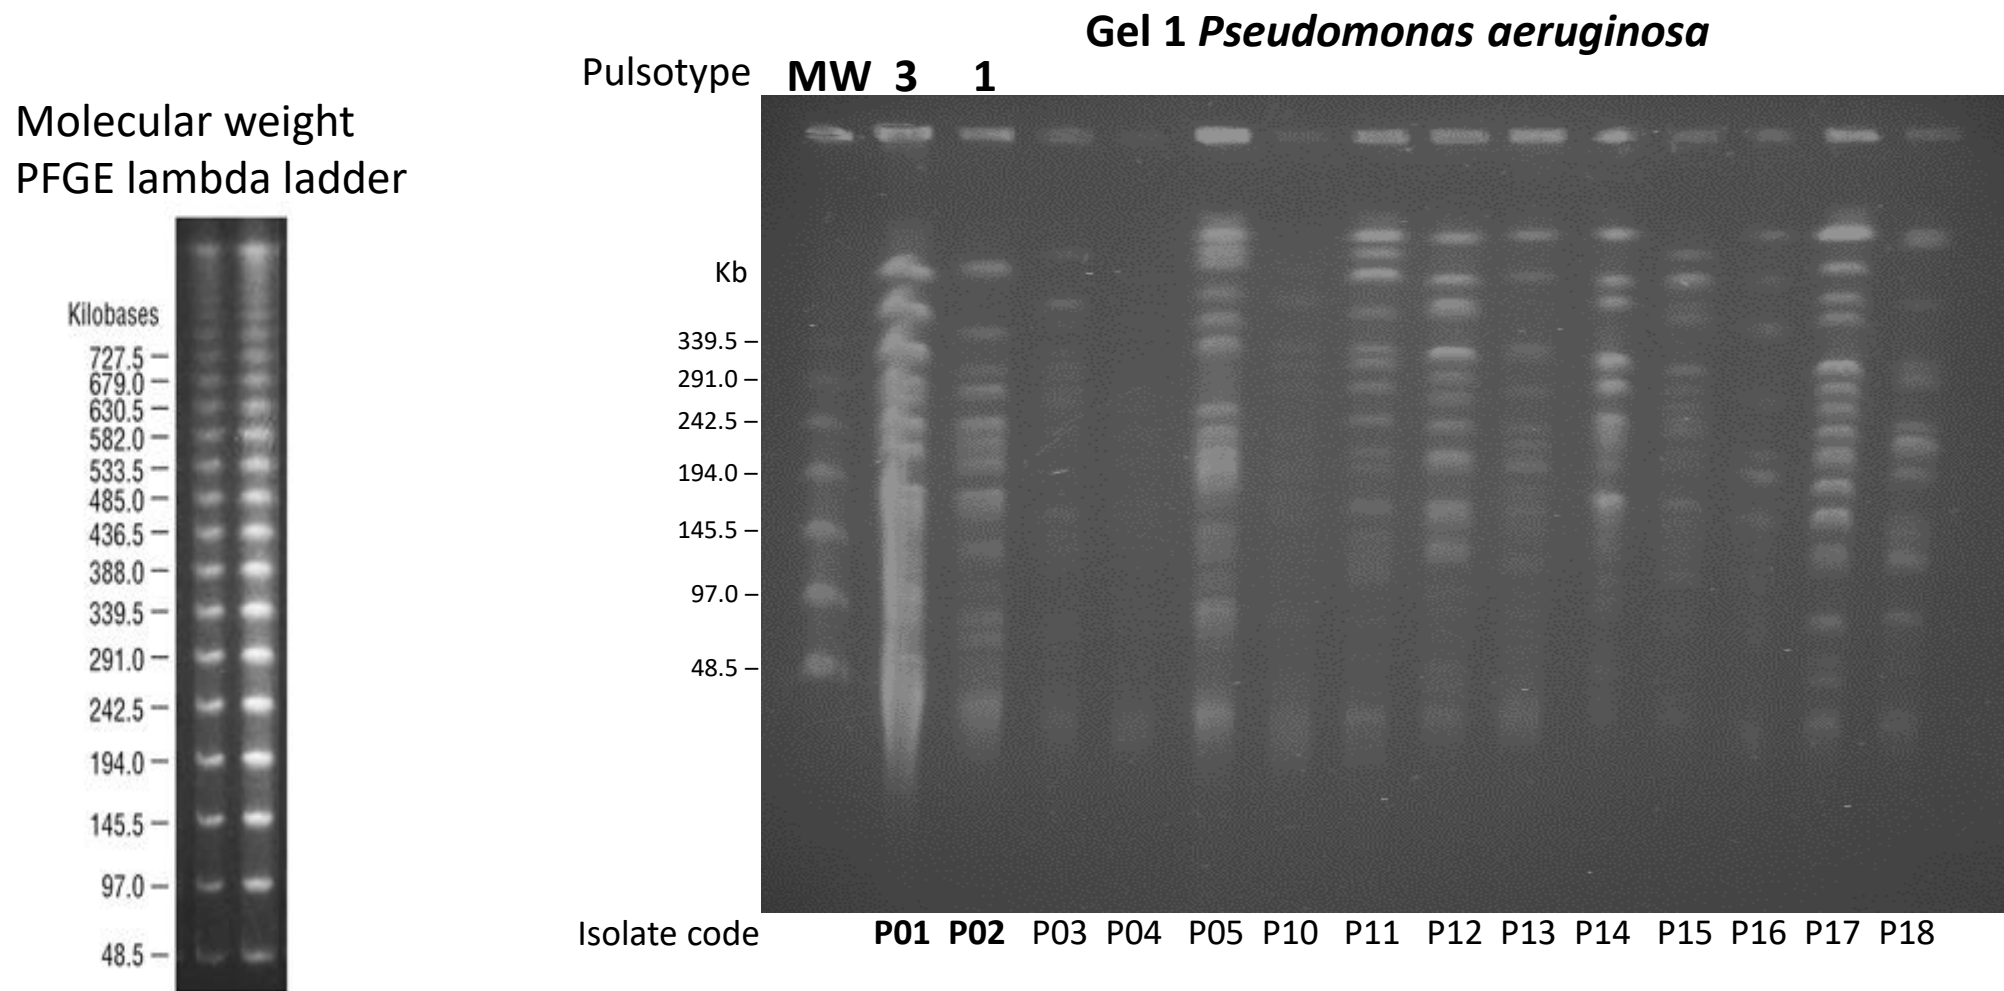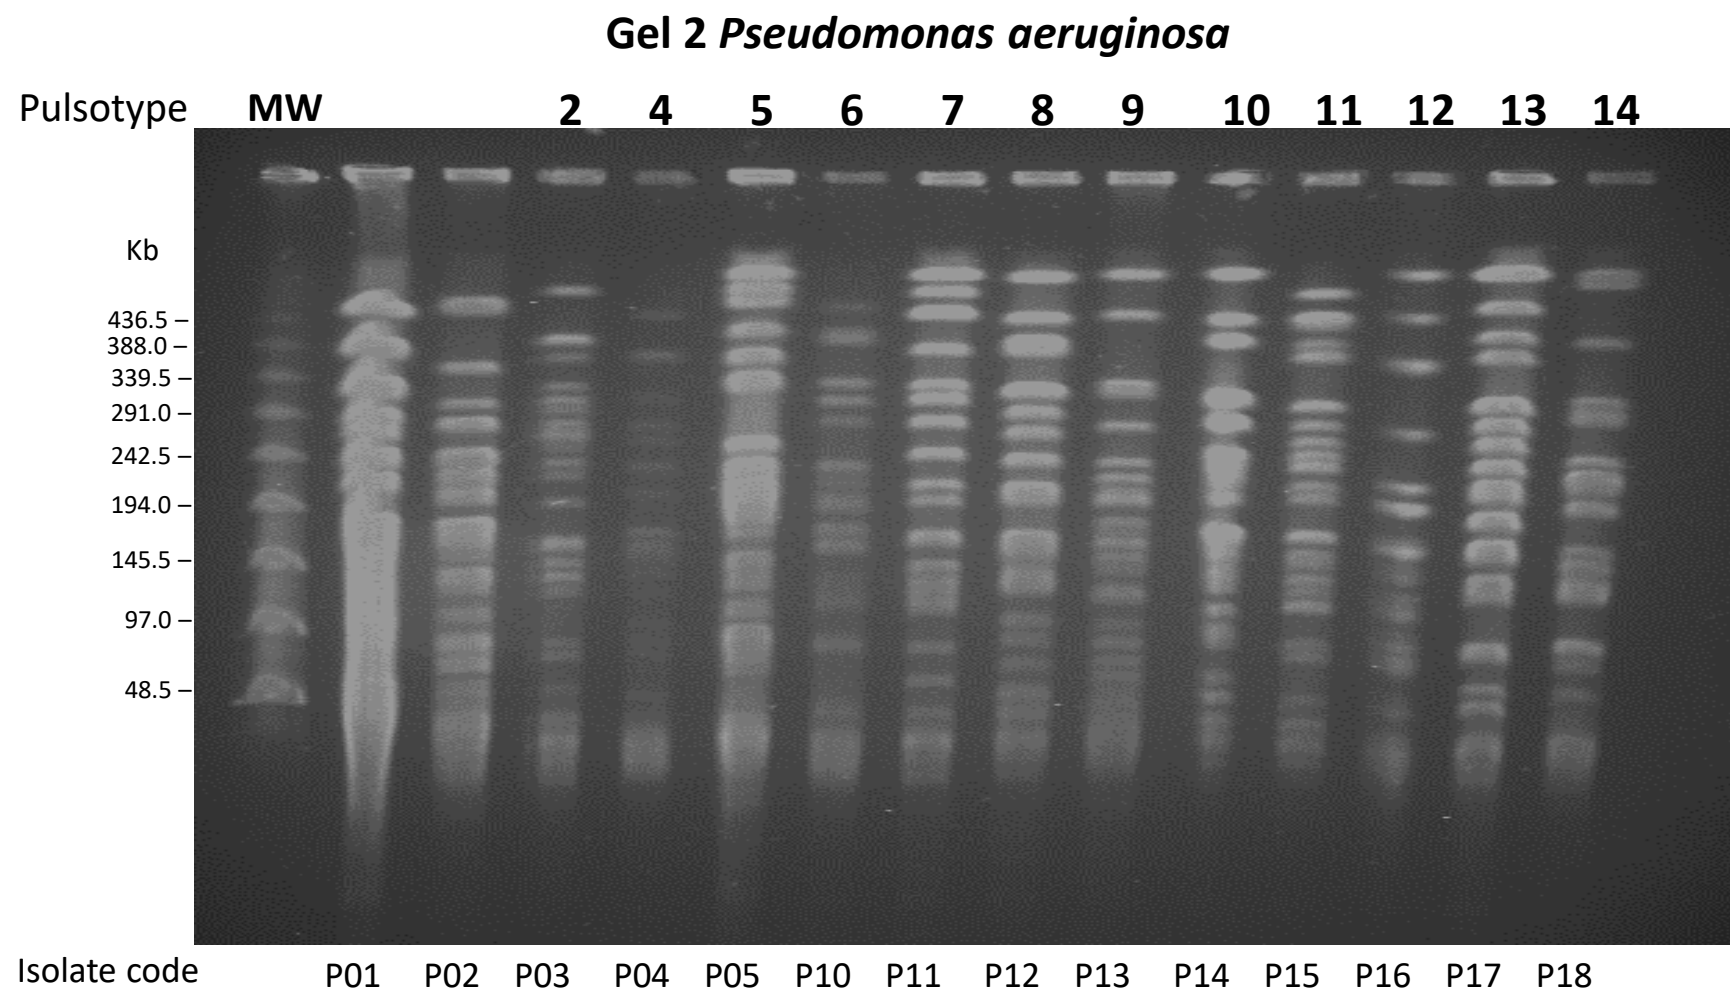

**Gel 3 *Pseudomonas aeruginosa***

Pulsotype **MW 15 16 17 18 19 20 20 MW**

Kb

630.5 –  
582.0 –  
533.5 –  
485.0 –  
436.5 –  
388.0 –  
339.5 –  
291.0 –  
242.5 –  
194.0 –  
145.5 –  
97.0 –  
48.5 –

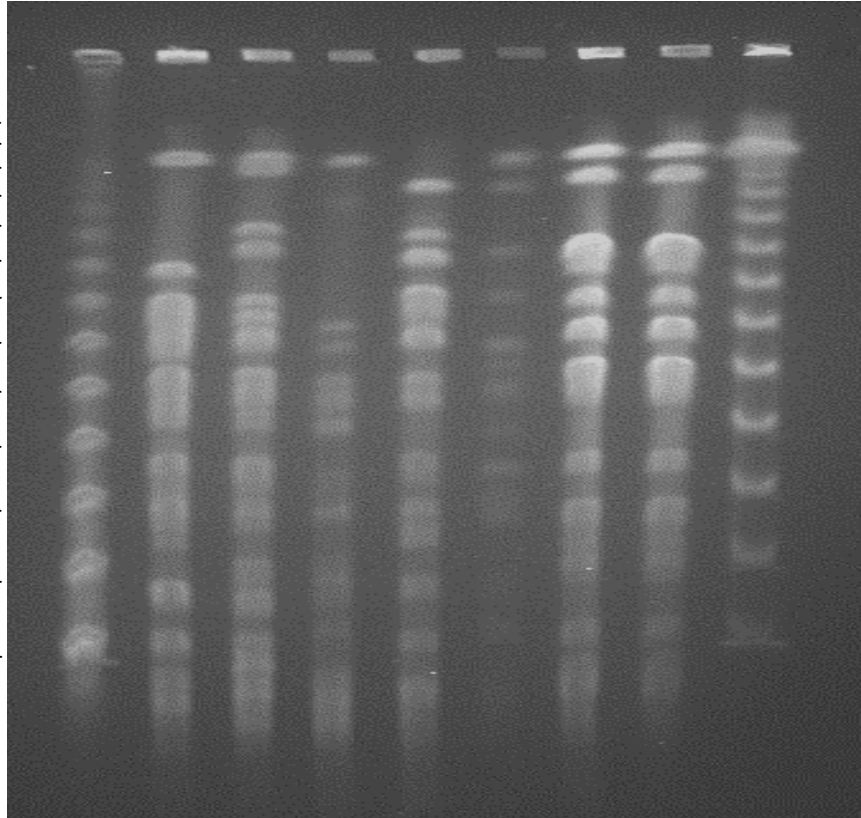

Isolate code      P19 P20 P21 P22 P23 P24 P25

Uncropped Gels  
*Enterobacter spp*

*Enterobacter* ( n = 17, pulsotypes = 16)  
Hospital General de México Dr. Eduardo Liceaga 2020

**Gel 3 *Enterobacter***

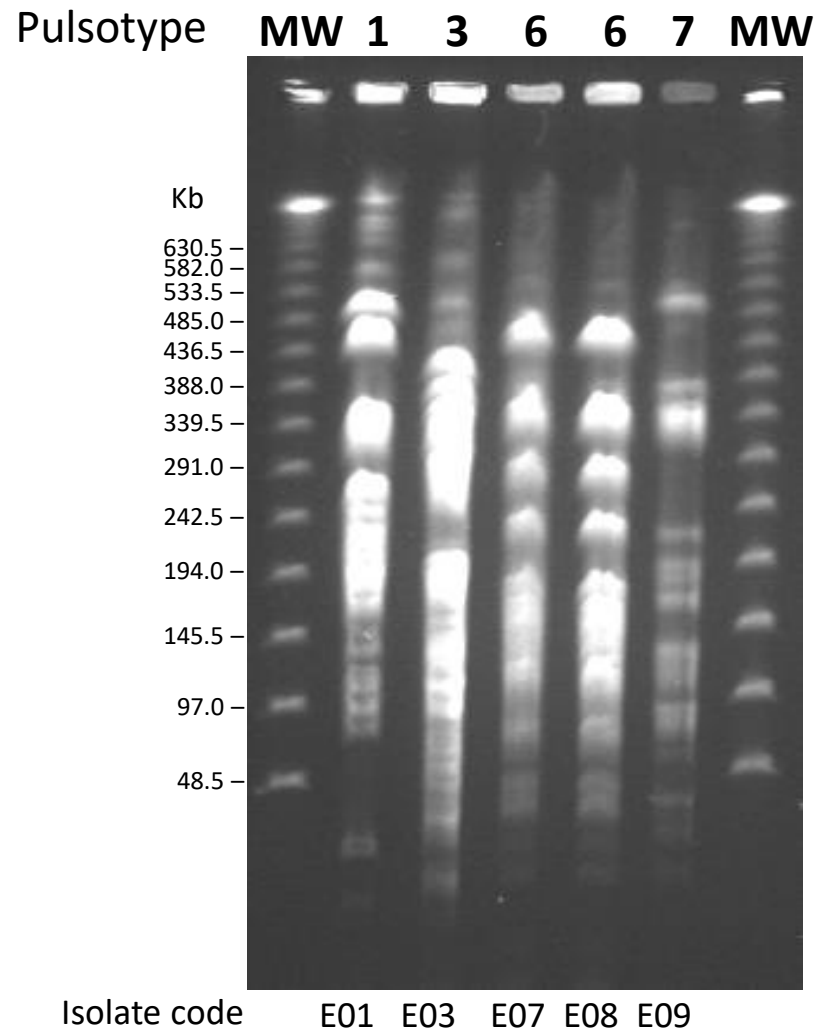

**Gel 1 *Enterobacter***

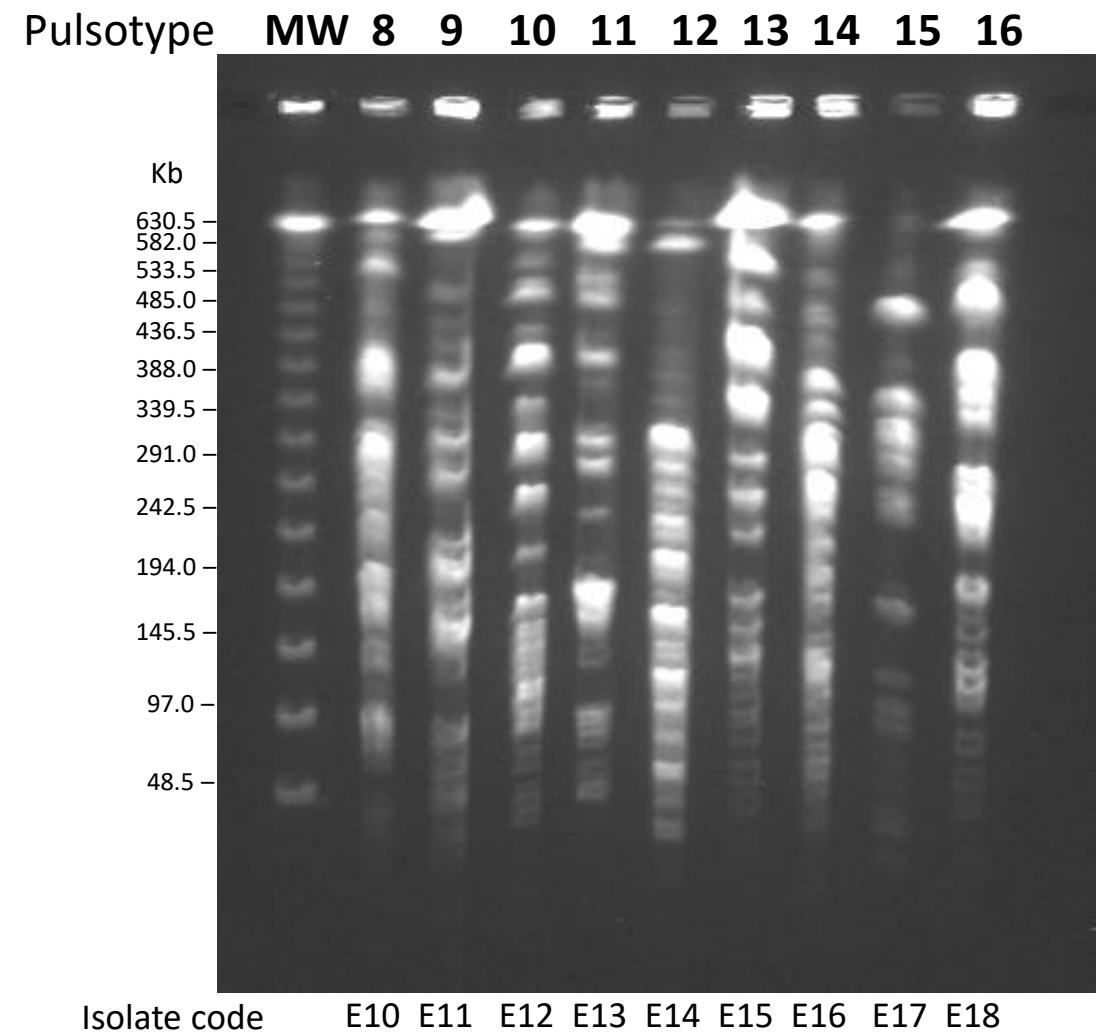

**Gel 2 *Enterobacter***

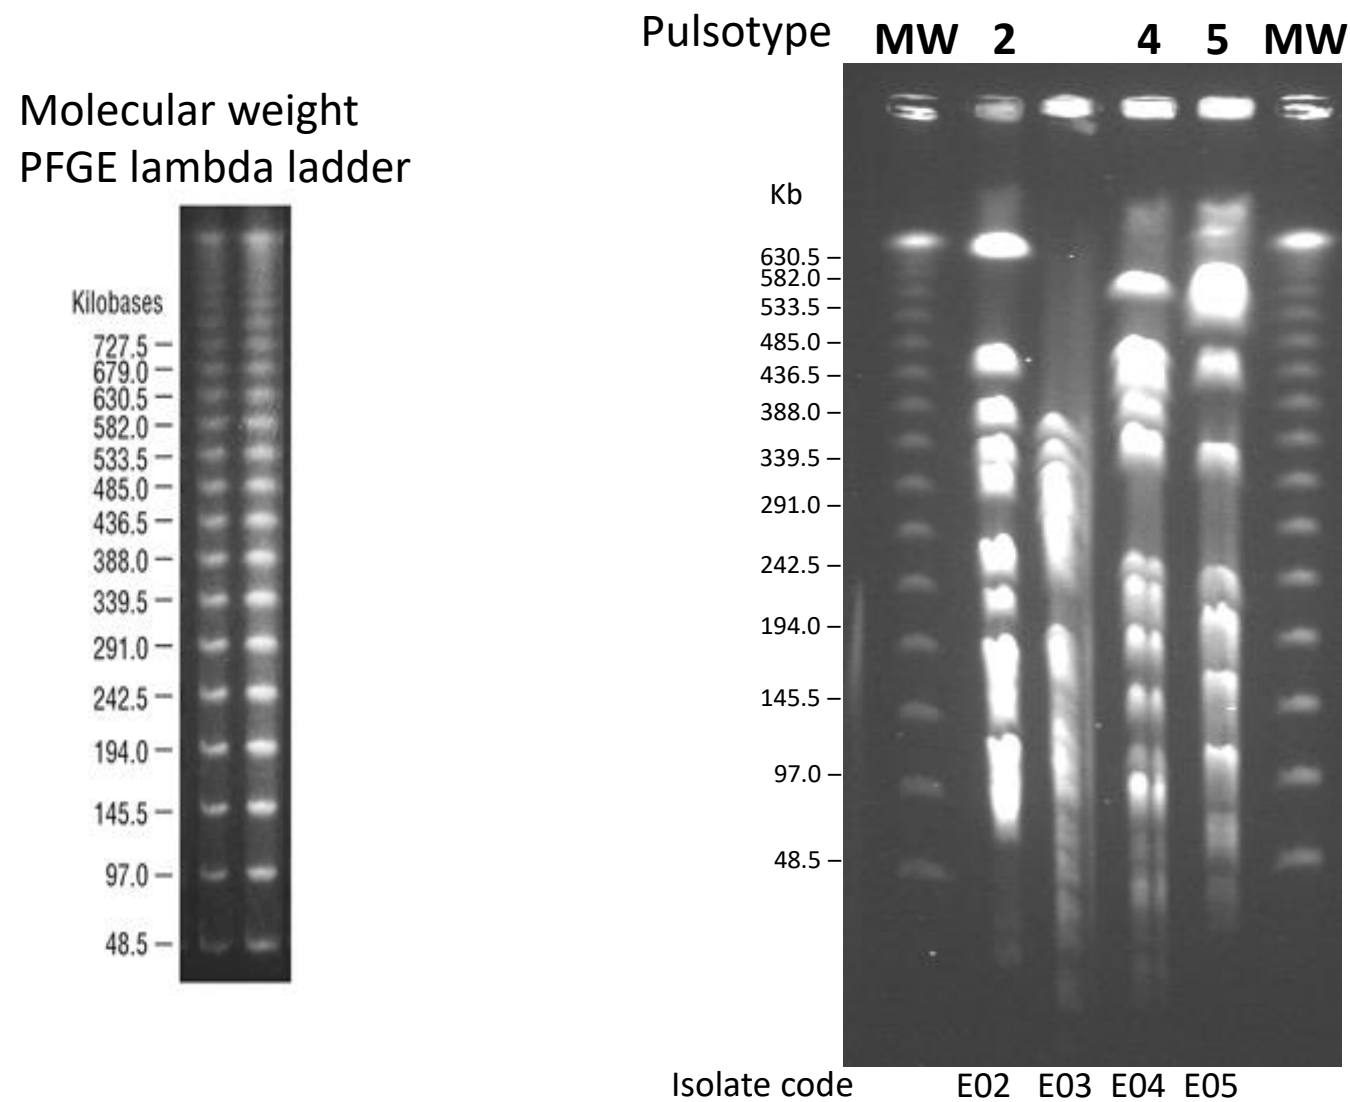

Supplement: peerj-11-15007-s002.pdf [file peerj-11-15007-s002.pdf]
