# Supplementary material for: Gram-negative ESKAPE bacteria bloodstream infections in patients during the COVID-19 pandemic
Source: PeerJ. 2023 Mar 29;11:e15007. doi: 10.7717/peerj.15007 (PMC10066687; doi:10.7717/peerj.15007)
Supplement: Supplemental Information 1 [file peerj-11-15007-s001.xlsx]

## Sheet: Acinetobacter baumannii
Isolate code	Isolation date	Ward	Clinical outcome	COVID-19	PFGE profile pattern (pulsotype)	ST/CC	BLEEs production	PCR and DNA sequencing BLEEs	Metallo-beta-lactamases (MBLs) production	MBLs/MEM phenotype	MBLs/IMP phenotype	PCR and DNA sequencing MBLs and OXA	PCR screening mcr-1	Efflux pumps phenotype	Antimicrobial resistance	Ampicillin/sulbactam (SAM)		Ceftazidime (CAZ)		Ciprofloxacin (CIP)		Doripenem (DOR)		Imipenem (IMP)		Meropenem (MEM)		Gentamicin (GEN)		Piperacillin/tazobactam (TZP)		Cefeoime (FEP)		Cefotaxime (CTX)		Ceftriaxone (CRO)		Colistin (COL)
																Categorie	MIC μg/mL	Categorie	MIC μg/mL	Categorie	MIC μg/mL	Categorie	MIC μg/mL	Categorie	MIC μg/mL	Categorie	MIC μg/mL	Categorie	MIC μg/mL	Categorie	MIC μg/mL	Categorie	MIC μg/mL	Categorie	MIC μg/mL	Categorie	MIC μg/mL	Categorie	MIC μg/mL
A1	2020-03-02	Intensive Care Unit	Died	No	1		Negative		Positive	Positive	Positive	OXA-23		Negative	MDR	R	>=32	R	>=64	R	>=4	R	>=8	R	>=16	R	>=16	I	8	R	>=128	R	>=64	R	>=64	R	>=64	I	2
A3	02/22/2020	Internal Medicine	Improved	No	1		Negative		Positive	Positive	Positive	OXA-23		Negative	MDR	R	16	R	>=64	R	>=4	R	>=8	R	>=16	R	>=16	I	8	R	>=128	R	>=64	R	>=64	R	>=64	I	2
A4	02/24/2020	Neurology	Died	No	2		Negative		Positive	Positive	Positive	OXA-23		Negative	MDR	R	>=32	R	>=64	R	>=4	R	>=8	R	>=16	R	>=16	I	8	R	>=128	R	>=64	R	>=64	R	>=64	I	2
A5	05/25/2020	Neurology	Improved	No	3		Positive	blaTEM	Positive	Positive	Positive	OXA-23		Negative	XDR	R	>=32	R	>=64	R	>=4	R	>=8	R	>=16	R	>=16	R	>=16	R	>=128	R	>=64	R	>=64	R	>=64	I	2
A6	05/25/2020	Intensive Care Unit	Died	Yes	3		Positive	blaTEM	Positive	Positive	Positive	OXA-23	Negative	Negative	XDR	R	>=32	R	>=64	R	>=4	R	>=8	R	>=16	R	>=16	R	>=16	R	>=128	R	>=64	R	>=64	R	>=64	R	16
A7	2020-08-06	Respiratory Infectious Ward	Died	Yes	4	369/92	Positive	blaTEM-1	Positive	Positive	Positive	OXA-398		Negative	XDR	R	>=32	R	>=64	R	>=4	R	>=8	R	>=16	R	>=16	R	>=16	R	>=128	R	>=64	R	>=64	R	>=64	I	2
A8	2020-08-06	Respiratory Infectious Ward	Died	Yes	4		Positive	blaTEM	Positive	Positive	Positive	OXA-23		Negative	XDR	R	>=32	R	>=64	R	>=4	R	>=8	R	>=16	R	>=16	R	>=16	R	>=128	R	>=64	R	>=64	R	>=64	I	1
A9	2020-09-06	Intensive Care Unit	Died	Yes	3		Positive	blaTEM	Positive	Positive	Positive	OXA-23	Negative	Negative	XDR	R	>=32	R	>=64	R	>=4	R	>=8	R	>=16	R	>=16	R	>=16	R	>=128	R	>=64	R	>=64	R	>=64	R	16
A10	2020-01-06	Intensive Care Unit	Improved	Yes	5		Negative		Positive	Positive	Positive	OXA-24		Negative	MDR	R	>=32	R	>=64	R	>=4	R	>=8	R	>=16	R	>=16	I	8	R	>=128	R	>=64	R	>=64	R	>=64	I	2
A12	2020-08-07	Respiratory Infectious Ward	Died	Yes	6		Negative		Positive	Positive	Positive	OXA-23		Negative	MDR	R	16	R	>=64	R	>=4	R	>=8	R	>=16	R	>=16	I	8	R	>=128	R	>=64	R	>=64	R	>=64	I	2
A13	2020-08-07	Infectious Diseases Unit	Died	Yes	7	208/92	Positive	blaTEM	Positive	Positive	Posotive			Negative	XDR	R	>=32	R	>=64	R	>=4	R	>=8	R	>=16	R	>=16	R	>=16	R	>=128	R	>=64	R	>=64	R	>=64	I	1
A14	07/23/2020	Infectious Diseases Unit	Died	No	7		Positive	blaTEM	Positive	Positive	Positive			Negative	XDR	R	>=32	R	>=64	R	>=4	R	>=8	R	>=16	R	>=16	R	>=16	R	>=128	R	>=64	R	>=64	R	>=64	I	0.5
A15	08/29/2020	Respiratory Infectious Ward	Improved	Yes	4	369/92	Positive	blaTEM	Positive	Positive	Positive	OXA-23	Negative	Negative	PDR	R	>=32	R	>=64	R	>=4	R	>=8	R	>=16	R	>=16	R	>=16	R	>=128	R	>=64	R	>=64	R	>=64	R	16
A16	08/31/2020	Respiratory Infectious Ward	Died	Yes	4		Positive	blaTEM	Positive	Positive	Positive	OXA-23	Negative	Negative	PDR	R	>=32	R	>=64	R	>=4	R	>=8	R	>=16	R	>=16	R	>=16	R	>=128	R	>=64	R	>=64	R	>=64	R	8
A17	2020-07-09	Cardiology	Died	Yes	8		Positive	blaTEM	Positive	Positive	Positive	OXA-23		Negative	XDR	R	>=32	R	>=64	R	>=4	R	>=8	R	>=16	R	>=16	R	>=16	R	>=128	R	>=64	R	>=64	R	>=64	I	0.5
A18	09/14/2020	Respiratory Infectious Ward	Died	Yes	4		Positive	blaTEM	Positive	Positive	Positive	OXA-23	Negative	Negative	PDR	R	>=32	R	>=64	R	>=4	R	>=8	R	>=16	R	>=16	R	>=16	R	>=128	R	>=64	R	>=64	R	>=64	R	4
A19	09/20/2020	Respiratory Infectious Ward	Died	Yes	4		Positive	blaTEM	Positive	Positive	Positive	OXA-23	Negative	Negative	PDR	R	>=32	R	>=64	R	>=4	R	>=8	R	>=16	R	>=16	R	>=16	R	>=128	R	>=64	R	>=64	R	>=64	R	4
A20	09/21/2020	Respiratory Infectious Ward	Improved	Yes	4		Positive	blaTEM	Positive	Positive	Positive	OXA-23	Negative	Negative	XDR	R	>=32	R	>=64	R	>=4	R	>=8	R	>=16	R	>=16	R	>=16	R	>=128	R	>=64	R	>=64	R	>=64	R	8
A21	09/28/2020	Respiratory Infectious Ward	Died	Yes	4		Positive	blaTEM	Positive	Positive	Positive	OXA-23		Negative	XDR	R	>=32	R	>=64	R	>=4	R	>=8	R	>=16	R	>=16	R	>=16	R	>=128	R	>=64	R	>=64	R	>=64	I	2
A22	2020-05-10	Respiratory Infectious Ward	Died	Yes	4		Positive	blaTEM	Positive	Positive	Positive	OXA-23	Negative	Negative	PDR	R	>=32	R	>=64	R	>=4	R	>=8	R	>=16	R	>=16	R	>=16	R	>=128	R	>=64	R	>=64	R	>=64	R	8
A23	10/16/2020	Respiratory Infectious Ward	Died	Yes	4	369/92	Positive	blaTEM	Positive	Positive	Positive	OXA-23	Negative	Negative	PDR	R	>=32	R	>=64	R	>=4	R	>=8	R	>=16	R	>=16	R	>=16	R	>=128	R	>=64	R	>=64	R	>=64	R	4
A24	11/16/2020	Respiratory Infectious Ward	Died	Yes	4		Positive	blaTEM	Positive	Positive	Positive	OXA-23		Negative	XDR	R	>=32	R	>=64	R	>=4	R	>=8	R	>=16	R	>=16	R	>=16	R	>=28	R	>=64	R	>=64	R	>=64	I	2
A25	11/16/2020	Respiratory Infectious Ward	Died	Yes	4		Positive	blaTEM	Positive	Positive	Positive	OXA-23		Negative	XDR	R	>=32	R	>=64	R	>=4	R	>=8	R	>=16	R	>=16	R	>=16	R	>=128	R	>=64	R	>=64	R	>=64	I	2
A26	11/16/2020	Respiratory Infectious Ward	Improved	Yes	4		Positive	blaTEM	Positive	Positive	Positive	OXA-23		Negative	XDR	R	>=32	R	>=64	R	>=4	R	>=8	R	>=16	R	>=16	R	>=16	R	>=128	R	>=64	R	>=64	R	>=64	I	2
A27	11/16/2020	Intensive Care Unit	Improved	No	9		Positive	blaTEM	Positive	Positive	Positive	OXA-23		Negative	XDR	R	>=32	R	>=64	R	>=4	R	>=8	R	>=16	R	>=16	R	>=16	R	>=128	R	>=64	R	>=64	R	>=64	I	2
A28	11/20/2020	Respiratory Infectious Ward	Improved	Yes	4		Positive	blaTEM	Positive	Positive	Positive	OXA-23		Negative	XDR	R	16	R	>=64	R	>=4	R	>=8	R	>=16	R	>=16	R	>=16	R	>=128	R	>=64	R	>=64	I	32	I	2
A29	11/23/2020	Respiratory Infectious Ward	Died	Yes	4		Positive	blaTEM	Positive	Positive	Positive	OXA-23	Negative	Negative	PDR	R	>=32	R	>=64	R	>=4	R	>=8	R	>=16	R	>=16	R	>=16	R	>=128	R	>=64	R	>=64	R	>=64	R	4
A30	11/24/2020	Infectious Diseases Unit	Died	Yes	7	208/92	Positive	blaTEM	Positive	Positive	Positive			Negative	XDR	R	>=32	R	>=64	R	>=4	R	>=8	R	>=16	R	>=16	R	>=16	R	>=128	R	>=64	R	>=64	R	>=64	I	2
A31	11/27/2020	Infectious Diseases Unit	Died	Yes	7		Positive	blaTEM	Positive	Positive	Positive			Negative	XDR	R	>=32	R	>=64	R	>=4	R	>=8	R	>=16	R	>=16	R	>=16	R	>=128	R	>=64	R	>=64	R	>=64	I	2
A32	2020-12-01	Internal Medicine	Improved	Yes	4	369/92	Positive	blaTEM-1	Positive	Positive	Positive	OXA-398		Negative	XDR	R	>=32	R	>=64	R	>=4	R	>=8	R	>=16	R	>=16	R	>=16	R	>=128	R	>=64	R	>=64	R	>=64	I	2
A33	2020-12-12	Infectious Diseases Unit	Died	Yes	7	208/92	Positive	blaTEM	Positive	Positive	Positive			Negative	XDR	R	>=32	R	>=64	R	>=4	R	>=8	R	>=16	R	>=16	R	>=16	R	>=128	R	>=64	R	>=64	R	>=64	I	2
A34	2021-04-01	Intensive Care Unit	Died	Yes	10		Positive	blaTEM-1	Positive	Positive	Positive	OXA-24		Negative	MDR	R	>=32	R	>=64	R	>=4	R	>=8	R	>=16	R	>=16	I	8	R	>=128	R	>=64	R	>=64	R	>=64	I	2
A35	2021-05-01	Neurology	Died	Yes	11		Positive	blaTEM	Positive	Positive	Positive	OXA-23		Negative	XDR	R	>=32	R	>=64	R	>=4	R	>=8	R	>=16	R	>=16	R	>=16	R	>=128	R	>=64	R	>=64	R	>=64	I	2
A36	01/17/2021	Neurology	Died	No	12		Negative		Positive	Positive	Positive	OXA-24		Negative	XDR	R	>=32	R	>=64	R	>=4	R	>=8	R	>=16	R	>=16	R	>=16	R	>=128	R	>=64	R	>=64	R	>=64	I	2
A37	01/18/2021	Intensive Care Unit	Improved	Yes	13		Positive	blaTEM	Positive	Positive	Positive	OXA-24		Negative	XDR	R	>=32	R	>=64	R	>=4	R	>=8	R	>=16	R	>=16	R	>=16	R	>=128	R	>=64	R	>=64	R	>=64	I	2
A38	01/18/2021	Intensive Care Unit	Died	Yes	14		Positive	blaTEM	Positive	Positive	Positive	OXA-23		Negative	XDR	R	>=32	R	>=64	R	>=4	R	>=8	R	>=16	R	>=16	R	>=16	R	>=128	R	>=64	R	>=64	R	>=64	I	2
A39	01/22/2021	Respiratory Infectious Ward	Died	Yes	14		Positive	blaTEM	Positive	Positive	Positive	OXA-23		Negative	XDR	R	>=32	R	>=64	R	>=4	R	>=8	R	>=16	R	>=16	R	>=16	R	>=128	R	>=64	R	>=64	R	>=64	I	2
A40	01/25/2021	Respiratory Infectious Ward	Died	Yes	15		Positive	blaTEM	Positive	Positive	Positive	OXA-23		Negative	XDR	R	>=32	R	>=64	R	>=4	R	>=8	R	>=16	R	>=16	R	>=16	R	>=128	R	>=64	R	>=64	R	>=64	I	2
A41	01/26/2021	Internal Medicine	Improved	Yes	16		Positive	blaTEM	Positive	Positive	Positive			Negative	XDR	R	>=32	R	>=64	R	>=4	R	>=8	R	>=16	R	>=16	R	>=16	R	>=128	R	>=64	R	>=64	R	>=64	I	2
					PFGE= Pulsed-field-gel-electrophoresis	ST= Sequence Type									MDR= multidrug-resistant	MIC, Minimum Inhibitory Concentration
						CC= Complex Clonal									XDR=extensively drug-resistant	I, intermediate resistant; R, resistant; S, susceptible
															PDR= Pandrug-resistant

## Sheet: Klebsiella pneumoniae
Isolate code	Isolation date	Ward	Clinical outcome	COVID-19	PFGE profile pattern (pulsotype)	PCR screeming BLEEs	DNA sequencing	Metallo-beta-lactamases (MBLs) production	MBLs/IMP phenotype	MBLs/MEM phenotype	DNA sequencing	AmpC	PCR screening mcr-1	Antimicrobial resistance	Gentamicin (GEN)		Amikacin (AMK)		Ampicillin-sulbactam (SAM)		Cefuroxime (CFX)		Cefepime (FEP)		Cefotaxime (CTX)		Ceftriaxone (CRO)		Ciprofloxacin (CIP)		Ertapenem (ETP)		Meropenem (MEM)		Colistin (COL)
															Categorie	MIC μg/mL	Categorie	MIC μg/mL	Categorie	MIC μg/mL	Categorie	MIC μg/mL	Categorie	MIC μg/mL	Categorie	MIC μg/mL	Categorie	MIC μg/mL	Categorie	MIC μg/mL	Categorie	MIC μg/mL	Categorie	MIC μg/mL	Categorie	MIC μg/mL
K1	2020-02-20	Emergency Department	Improved	No	4	blaTEM, blaCTX-M		Negative				Negative		MDR	R	>=16	S	<=2	R	>=32	R	>=64	R	2	R	>=64	R	>=64	R	>=4	S	<=0.5	S	<=0.25	I	2
K2	2020-02-05	Intensive Care Unit	Improved	No	1	blaTEM, blaCTX-M		Negative				Negative	Negative	MDR	R	>=16	S	4	R	>=32	R	>=64	R	2	R	>=64	R	>=64	R	>=4	S	<=0.5	S	<=0.25	R	16
K3	2020-02-06	Oncology	Died	No	2	Negative		Negative				Negative	Negative	No	S	<=1	S	<=2	S	4	S	2	S	<=1	S	<=1	S	<=1	S	<=0.25	S	<=0.5	S	<=0.25	R	16
K4	2020-02-16	Oncology	Improved	No	3	blaTEM, blaCTX-M		Negative				Negative	Negative	MDR	S	<=1	S	<=2	R	>=32	R	>=64	R	2	R	>=64	R	>=64	R	2	S	<=0.5	S	<=0.25	R	4
K5	2020-02-18	Nephrology	Improved	No	NT	Negative		Negative				Negative	Negative	No	S	<=1	S	<=2	S	4	S	<=1	S	<=1	S	<=1	S	<=1	S	<=0.25	S	<=0.5	S	<=0.25	R	4
K6	2020-03-12	Hematology	Improved	No	5	blaTEM, blaCTX-M		Negative				Negative		MDR	R	>=16	S	4	R	>=32	R	>=64	R	2	R	>=64	R	>=64	R	>=4	S	<=0.5	S	<=0.25	I	2
K8	2020-03-04	Endocrinology	Improved	No	4	blaTEM, blaCTX-M		Negative				Negative	Negative	MDR	R	>=16	S	<=2	R	>=32	R	>=64	R	2	R	>=64	R	>=64	R	>=4	S	<=0.5	S	<=0.25	R	4
K9	2020-04-15	Respiratory Infectious Ward	Improved	Yes	7	blaTEM, blaCTX-M	blaTEM-1, blaCTX-M-15	Negative				Negative	Negative	MDR	S	<=1	S	<=2	R	>=32	R	>=64	R	2	R	>=64	R	>=64	S	<=0.25	S	<=0.5	S	<=0.25	R	4
K10	2020-04-26	Internal Medicine	Improved	No	7	blaTEM, blaCTX-M		Negative				Negative		MDR	S	<=1	S	<=2	R	>=32	R	>=64	R	2	R	>=64	R	>=64	S	<=0.25	S	<=0.5	S	<=0.25	I	2
K11	2020-05-20	Neurosurgery	Died	No	9	blaTEM, blaCTX-M		Negative				Negative	Negative	MDR	R	>=16	S	<=2	R	>=32	R	>=64	R	4	R	>=64	R	>=64	R	>=4	S	<=0.5	S	<=0.25	R	16
K12	2020-05-16	Respiratory Infectious Ward	Improved	Yes	8	blaCTX-M	blaCTX-M-15	Negative				Negative		MDR	S	<=1	S	<=2	S	8	R	>=64	R	2	R	>=64	R	>=64	I	0.5	S	<=0.5	S	<=0.25	I	2
K13	03/23/2020	Emergency Department	Improved	No	6	blaCTX-M		Negative				Negative		MDR	S	<=1	S	<=2	R	>=32	R	>=64	R	2	R	>=64	R	>=64	S	<=0.25	S	<=0.5	S	<=0.25	I	1
K14	05/28/2020	Oncology	Improved	No	10	blaTEM, blaCTX-M		Negative				Negative	Negative	MDR	R	>=16	S	<=2	R	>=32	R	>=64	R	>=64	R	>=64	R	>=64	R	2	S	<=0.5	S	<=0.25	R	8
K15	2020-04-06	Neurology	Died	No	NT	blaTEM, blaCTX-M		Negative				Negative	Negative	MDR	R	>=16	S	<=2	R	>=32	R	>=64	R	2	R	>=64	R	>=64	R	>=4	S	<=0.5	S	<=0.25	R	4
K16	2020-08-06	Surgical Tower	Improved	No	11	blaTEM, blaCTX-M		Negative				Negative	Negative	MDR	S	<=1	S	<=2	R	>=32	R	>=64	R	2	R	8	R	32	R	>=4	S	<=0.5	S	<=0.25	R	16
K17	08/17/2020	Hematology	Improved	No	15	blaTEM, blaCTX-M		Negative				Negative	Negative	MDR	R	>=16	S	4	R	>=32	R	>=64	R	2	R	>=64	R	>=64	R	>=4	S	<=0.5	S	<=0.25	R	4
K18	08/28/2020	Neurosurgery	Improved	No	16	blaTEM, blaCTX-M		Negative				Negative	Negative	MDR	S	<=1	S	<=2	R	>=32	R	>=64	R	2	R	>=64	R	>=64	R	>=4	S	<=0.5	S	<=0.25	R	32
K19	07/14/2020	Neurosurgery	Improved	No	12	blaTEM, blaCTX-M		Negative				Negative	Negative	MDR	R	>=16	S	4	R	>=32	R	>=64	R	>=64	R	>=64	R	>=64	R	2	S	<=0.5	S	<=0.25	R	8
K20	07/15/2020	Neurosurgery	Died	No	13	blaTEM, blaCTX-M		Negative				Negative		MDR	S	<=1	S	<=2	R	>=32	R	>=64	R	2	R	>=64	R	>=64	R	>=4	S	<=0.5	S	<=0.25	I	2
K21	2020-06-08	Orthopedics	Improved	No	14	Negative		Negative				Negative		MDR	S	<=1	S	<=2	R	>=32	S	2	S	<=1	S	<=1	S	<=1	S	<=0.25	S	<=0.5	S	<=0.25	I	2
K22	2020-01-09	Emergency Department	Improved	No	16	blaTEM, blaCTX-M		Negative				Negative	Negative	MDR	S	<=1	S	<=2	R	>=32	R	>=64	R	>=64	R	>=64	R	>=64	R	>=4	S	<=0.5	S	<=0.25	R	64
K23	2020-02-09	Neurosurgery	Improved	No	NT	blaTEM, blaCTX-M		Negative				Negative	Negative	MDR	S	<=1	S	<=2	R	>=32	R	>=64	R	2	R	>=64	R	>=64	R	>=4	S	<=0.5	S	<=0.25	R	32
K24	2020-10-09	Internal Medicine	Improved	Yes	17	blaTEM, blaCTX-M		Positive	Positive	Positive	blaNDM-1	Negative	Negative	XDR	R	>=16	R	>=64	R	>=32	R	>=64	R	>=64	R	>=64	R	>=64	R	>=4	R	>=8	R	>=16	R	64
K25	2020-11-09	Plastic Surgery	Improved	Yes	18	blaCTX-M		Negative				Negative		MDR	S	<=1	S	<=2	I	16	R	>=64	R	>=64	R	>=64	R	>=64	I	0.5	S	<=0.5	S	<=0.25	I	1
K26	09/16/2020	Respiratory Infectious Ward	Died	Yes	17	blaTEM, blaCTX-M		Positive	Positive	Positive	blaNDM-1	Negative	Negative	XDR	R	>=16	R	>=64	R	>=32	R	>=64	R	>=64	R	>=64	R	>=64	R	>=4	R	>=8	R	>=16	R	64
K27	2020-05-10	Cardiology	Improved	No	19	blaTEM, blaCTX-M		Negative				Negative		MDR	R	>=16	S	4	R	>=32	R	>=64	R	4	R	>=64	R	>=64	R	>=4	S	<=0.5	S	<=0.25	I	2
K28	2020-05-11	Emergency Department	Improved	No	20	Negative		Negative				Negative		No	S	<=1	S	<=2	S	<=2	S	<=1	S	<=1	S	<=1	S	<=1	S	<=0.25	S	<=0.5	S	<=0.25	I	2
K29	2020-06-11	Hematology	Improved	No	21	Negative		Negative				Negative	Negative	No	S	<=1	S	<=2	S	8	S	2	S	<=1	S	<=1	S	<=1	S	<=0.25	S	<=0.5	S	<=0.25	R	4
K30	11/13/2020	Nephrology	Died	No	22	blaTEM, blaCTX-M		Negative				Negative	Negative	MDR	R	>=16	S	4	R	>=32	R	>=64	R	32	R	>=64	R	>=64	R	>=4	S	<=0.5	S	<=0.25	R	4
K31	11/27/2020	Neurosurgery	Died	No	23	blaTEM, blaCTX-M		Negative				Negative	Negative	MDR	R	>=16	S	4	R	>=32	R	>=64	R	4	R	>=64	R	>=64	R	2	S	<=0.5	S	<=0.25	R	8
K32	11/27/2020	Nephrology	Improved	No	24	blaTEM, blaCTX-M		Negative				Negative		MDR	R	>=16	S	8	R	>=32	R	>=64	R	2	R	>=64	R	>=64	R	>=4	S	<=0.5	S	<=0.25	I	2
K33	2020-04-12	Respiratory Infectious Ward	Died	Yes	25	blaCTX-M		Negative				Negative		MDR	S	<=1	S	<=2	I	16	R	>=64	R	4	R	>=64	R	>=64	I	0.5	S	<=0.5	S	<=0.25	I	2
					PFGE= Pulsed-field-gel-electrophoresis									MDR= multidrug-resistant	MIC, Minimum Inhibitory Concentration
					NT: Not typable									XDR=extensively drug-resistant	I, intermediate resistant; R, resistant; S, susceptible
														PDR= Pandrug-resistant

## Sheet: Pseudomonas aeruginosa
Isolate code	Isolation date	Ward	Clinical outcome	COVID-19	PFGE profile pattern (pulsotype)	Metallo-beta-lactamases (MBLs) production	MBLs/IMP phenotype	MBLs/MEM phenotype	PCR and DNA sequencing	AmpC	PCR screening mcr-1	Antimicrobial resistance	Ceftazidime (CAZ)		Gentamicin (GEN)		Amikacin (AMK)		Cefepime (FEP)		Ciprofloxacin (CIP)		Meropenem (MEM)		Colistin (COL)
													Categorie	MIC μg/mL	Categorie	MIC μg/mL	Categorie	MIC μg/mL	Categorie	MIC μg/mL	Categorie	MIC μg/mL	Categorie	MIC μg/mL	Categorie	MIC μg/mL
P1	2020-02-09	Emergency Department	Died	No	3	Negative	Positive	Positive	Negative	Intrinsec		MDR	I	16	S	2	S	<=2	I	16	R	>=4	R	8	I	1
P2	2020-02-05	Nefrology	Improved	No	1	Negative				Intrinsec		No	S	4	R	>=16	S	4	S	8	S	0.5	S	1	I	0.25
P3	2020-02-07	Rheumatology	Died	No	2	Negative				Intrinsec		No	S	4	S	<=1	S	<=2	S	2	S	<=0.25	S	<=0.25	I	2
P4	03/29/2020	Surgical Tower	Died	No	4	Negative	Positive	Positive	Negative	Intrinsec		No	I	16	S	4	S	<=2	I	16	R	>=4	I	18 mm	I	1
P5	03/30/2020	Surgical Tower	Improved	No	5	Positive	Positive	Positive	blaVIM-2	Intrinsec		XDR	R	>=64	R	>=16	R	>=64	R	>=64	R	>=4	R	>=16	I	1
P6	04/28/2020	Emergency Department	Died	No	NT	Negative				Intrinsec		No	S	2	S	<=1	S	<=2	S	2	S	0.5	S	1	I	1
P7	05/19/2020	Neurosurgery	Improved	No	NT	Negative	Positive	Positive	Negative	Intrinsec		MDR	S	8	S	<=1	S	<=2	S	8	R	2	R	>=16	I	1
P8	2020-03-06	Internal Medicine	Improved	No	NT	Negative				Intrinsec	Negative	No	S	4	S	<=1	S	<=2	S	2	S	0.5	S	<=0.25	R	4
P9	05/27/2020	Neurosurgery	Died	Yes	NT	Negative				Intrinsec	Negative	No	S	2	S	<=1	S	<=2	S	<=1	S	<=0.25	S	1	R	8
P10	2020-05-07	Infectious Diseases Unit	Improved	Yes	6	Negative				Intrinsec		No	S	4	S	<=1	S	<=2	S	2	S	<=0.25	S	0.5	I	0.5
P11	2020-05-07	Urology	Improved	No	7	Negative				Intrinsec		No	S	4	S	2	S	<=2	S	2	S	<=0.25	S	<=0.25	I	1
P12	2020-06-07	Neurosurgery	Improved	No	8	Negative				Intrinsec		No	S	4	S	<=1	S	<=2	S	2	S	<=0.25	S	<=0.25	I	0.5
P13	2020-02-09	Respiratory Infectious Ward	Died	Yes	9	Negative	Positive	Positive	Negative	Intrinsec		XDR	R	>=64	R	>=16	R	>=64	R	>=64	R	>=4	R	>=16	I	0.5
P14	2020-06-09	Internal Medicine	Improved	No	10	Negative				Intrinsec		No	S	4	S	2	S	<=2	S	2	S	<=0.25	S	<=0.25	I	0.5
P15	2020-07-09	Cardiology	Died	Yes	11	Negative				Intrinsec		No	S	4	S	<=1	S	<=2	S	2	S	<=0.25	S	23 mm	I	1
P16	09/19/2020	Infectious Diseases Unit	Died	Yes	12	Negative	Positive	Positive	Negative	Intrinsec		XDR	R	>=64	R	>=16	R	>=64	R	>=64	R	>=4	R	>=16	I	0.5
P17	09/29/2020	Neurosurgery	Improved	No	13	Negative				Intrinsec		No	S	2	S	2	S	<=2	S	<=1	S	<=0.25	S	21 mm	I	2
P18	2020-12-10	Neurosurgery	Died	No	14	Negative				Intrinsec		No	S	4	S	2	S	<=2	S	2	S	<=0.25	S	0.5	I	0.5
P19	2020-12-10	Urology	Improved	No	15	Negative				Intrinsec		No	S	4	S	4	S	4	S	2	S	<=0.25	S	<=0.25	I	1
P20	10/20/2020	Internal Medicine	Died	No	16	Negative				Intrinsec		No	S	2	R	>=16	S	<=2	S	<=1	S	<=0.25	S	<=0.25	I	1
P21	2020-09-11	Gynecology	Improved	No	17	Negative				Intrinsec		No	S	4	S	4	S	4	S	8	S	0.5	S	1	I	2
P22	11/23/2020	Surgical Tower	Improved	No	18	Negative				Intrinsec		No	S	2	S	<=1	S	<=2	S	2	S	0.5	S	0.5	I	1
P23	11/26/2020	Internal Medicine	Died	Yes	19	Negative				Intrinsec	Negative	No	S	4	S	<=1	S	<=2	S	<=1	S	<=0.25	S	<=0.25	R	4
P24	11/28/2020	Oncology	Improved	No	20	Negative				Intrinsec		No	R	>=64	S	2	S	<=2	R	32	S	<=0.25	S	1	I	1
P25	11/30/2020	Plastic Surgery	Improved	No	20	Negative				Intrinsec		No	R	>=64	S	2	S	<=2	R	>=64	S	<=0.25	S	1	I	1
P26	01/21/2021	Neurosurgery	Improved	No	NT	Negative				Intrinsec		No	S	2	S	2	S	4	S	4	S	0.5	I	4	I	1
					PFGE= Pulsed-field-gel-electrophoresis							MDR= multidrug-resistant	MIC, Minimum Inhibitory Concentration
					NT: Not typable							XDR=extensively drug-resistant	I, intermediate resistant; R, resistant; S, susceptible
												PDR= Pandrug-resistant

## Sheet: Enterobacter spp.
Isolate code	Isolation date	Ward	Clinical outcome	COVID-19	PFGE profile pattern (pulsotype)	Metallo-beta-lactamases (MBLs) production	MBLs/IMP phenotype	MBLs/MEM phenotype	PCR and DNA sequencing	AmpC	PCR screening mcr-1	Antimicrobial resistance	Gentamicin (GEN)		Amikacin (AMK)		Cefuroxime (CFX)		Cefepime (FEP)		Cefotaxime (CTX)		Ceftriaxone (CRO)		Ciprofloxacin (CIP)		Ertapenem (ETP)		Meropenem (MEM)		Colistin (COL)
													Categorie	MIC μg/mL	Categorie	MIC μg/mL	Categorie	MIC μg/mL	Categorie	MIC μg/mL	Categorie	MIC μg/mL	Categorie	MIC μg/mL	Categorie	MIC μg/mL	Categorie	MIC μg/mL	Categorie	MIC μg/mL	Categorie	MIC μg/mL
E1	02/23/2020	Urology	discharge against medical advice	No	1	Negative				Intrinsec	Negative	No	S	<=1	S	<=2	R	>=64	S	<=1	R	16	R	16	S	<=0.25	S	<=0.5	S	<=0.25	R	16
E2	2020-08-03	Surgical Tower	Improved	No	2	Negative				Intrinsec		No	S	<=1	S	<=2	S	4	S	<=1	S	<=1	S	<=1	S	<=0.25	S	<=0.25	S	<=0.25	I	1
E3	2020-11-04	Internal Medicine	Improved	No	3	Negative				Intrinsec		No	S	<=1	S	<=2	R	>=64	R	>=64	R	>=64	R	>=64	I	0.5	S	<=0.5	S	<=0.25	I	1
E4	05/26/2020	Respiratory Infectious Ward	Died	Yes	4	Negative				Intrinsec		MDR	S	<=1	R	16	R	>=64	R	>=64	R	>=64	R	>=64	S	<=0.25	S	<=0.5	S	<=0.25	I	1
E5	2020-02-07	Respiratory Infectious Ward	Improved	Yes	5	Negative				Intrinsec	Negative	No	S	<=1	S	<=2	I	16	S	<=1	S	<=1	S	<=1	S	<=0.25	S	<=0.5	S	<=0.25	R	16
E6	07/22/2020	Hematology	Improved	No	NT	Negative				Intrinsec	Negative	No	S	<=1	S	<=2	I	16	S	<=1	S	<=1	S	<=1	S	<=0.25	S	<=0.5	S	<=0.25	R	32
E7	2020-11-09	Neurosurgery	Improved	No	6	Negative				Intrinsec		MDR	R	>=16	S	4	R	>=64	R	32	R	>=64	R	>=64	R	2	S	<=0.5	S	<=0.25	I	2
E8	2020-11-09	Neurosurgery	Died	No	6	Negative				Intrinsec		MDR	R	>=16	S	4	R	>=64	R	32	R	>=64	R	>=64	R	2	S	<=0.5	S	<=0.25	I	2
E9	09/14/2020	Respiratory Infectious Ward	Died	Yes	7	Negative				Intrinsec		No	S	<=1	S	<=2	I	16	S	<=1	S	<=1	S	<=1	S	<=0.25	S	<=0.5	S	<=0.25	I	2
E10	09/18/2020	Intensive Care Unit	Died	No	8	Negative				Intrinsec	Negative	No	S	<=1	S	<=2	S	8	S	<=1	S	<=1	S	<=1	S	<=0.25	S	<=0.5	S	<=0.25	R	>128
E11	09/25/2020	Geriatrics	Died	No	9	Positive	Positive	Positive	blaNDM-1	Intrinsec		XDR	R	>=16	R	>=64	R	>=64	R	>=64	R	>=64	R	>=64	R	>=4	R	>=8	R	>=16	I	2
E12	09/29/2020	Respiratory Infectious Ward	Improved	Yes	10	Negative				Intrinsec		MDR	R	>=16	S	<=2	R	>=64	R	32	R	>=64	R	>=64	R	>=4	I	1	S	<=0.25	I	2
E13	2020-07-10	Hematology	Died	No	11	Negative				Intrinsec	Negative	No	S	<=1	S	<=2	R	>=64	S	<=1	R	>=64	R	>=64	S	<=0.25	R	2	S	<=0.25	R	8
E14	10/16/2020	Geriatrics	Improved	No	12	Negative				Intrinsec	Negative	MDR	S	2	R	32	R	>=64	S	<=1	R	8	R	8	S	<=0.25	S	<=0.5	S	<=0.25	R	>128
E15	10/20/2020	Geriatrics	Improved	No	13	Negative				Intrinsec	Negative	No	S	<=1	S	<=2	S	8	S	<=1	S	<=1	S	<=1	S	<=0.25	S	<=0.5	S	<=0.25	R	8
E16	2020-09-11	Intensive Care Unit	Died	Yes	14	Negative				Intrinsec		No	S	<=1	S	<=2	R	32	S	<=1	R	4	R	8	S	<=0.25	S	<=0.5	S	<=0.25	I	1
E17	11/16/2020	Surgical Tower	Improved	No	15	Negative				Intrinsec		No	S	<=1	S	<=2	R	16	S	<=1	S	<=1	S	<=1	S	<=0.25	S	<=0.5	S	<=0.25	I	1
E18	11/24/2020	Internal Medicine	Died	Yes	16	Negative				Intrinsec	Negative	No	S	<=1	S	<=2	R	16	S	<=1	S	<=1	S	<=1	R	1	S	<=0.5	S	<=0.25	R	4
					PFGE= Pulsed-field-gel-electrophoresis							MDR= multidrug-resistant
					NT: Not typable							XDR=extensively drug-resistant	MIC, Minimum Inhibitory Concentration
												PDR= Pandrug-resistant	I, intermediate resistant; R, resistant; S, susceptible
